# Supplementary material for: Synthesis of a core–shell–shell structured acid–base bifunctional mesoporous silica nanoreactor (MS-SO3H@MS@MS-NH2) and its application in tandem catalysis
Source: Royal Society of Chemistry journal article supplement (doi:10.1039/c3ta13185h), 2013-01-01
Supplement: c3ta13185h.pdf [file c3ta13185h.pdf]

Electronic Supplementary Information (ESI) for Journal of Materials Chemistry A

Synthesis of core-shell-shell structured acid-base bifunctional  
mesoporous silica nanoreactor (MS-SO<sub>3</sub>H@MS@MS-NH<sub>2</sub>) and its  
application in tandem catalysis

Ping Li, Chang-Yan Cao, Hua Liu, Yu Yu and Wei-Guo Song\*

*Beijing National Laboratory for Molecular Sciences (BNLMS), CAS Key Laboratory of  
Molecular Nanostructures and Nanotechnology, Institute of Chemistry, Chinese Academy of  
Sciences, Beijing, 100190, P. R. China. E-mail: [wsong@iccas.ac.cn](mailto:wsong@iccas.ac.cn); Fax: (+86) 10-62557908*

**Section S1. Synthesis of MS-SO<sub>3</sub>H@MS@MS-NH<sub>2</sub> with different particle sizes and catalytic active site concentrations via adjusting the preparation parameters.**

**(a) MS-SO<sub>3</sub>H@MS@MS-NH<sub>2</sub> (d = 40-50 nm, -SO<sub>3</sub>H content = 0.47 mmol/g, -NH<sub>2</sub> content = 0.51 mmol/g)**

First, 3.0 mL of TEOS and 210 μL of MPTMS was added sequentially into the homogeneous solution composed of H<sub>2</sub>O (40 mL), ethanol (8 mL), CTAB (1.5 g) and 25 wt% NH<sub>3</sub>·H<sub>2</sub>O (160 μL) under vigorous stirring at 60 °C. After continually stirring for 1 h, TEOS (200 μL) was added to create an intermediate shell in order to isolate the inner core shell from the outer shell. The resulting suspension was stirred for an additional 1 h. Then a mixture of TEOS (260 μL) and APTMS (240 μL) was added. The following steps, that is, template removal, amino group protection/deprotection and thiol group oxidation were conducted via the same synthesis route of MS-SO<sub>3</sub>H@MS@MS-NH<sub>2</sub> in Experimental section 2.2.

The TEM image of the sample was shown in Figure S2a.

**(b) MS-SO<sub>3</sub>H@MS@MS-NH<sub>2</sub> (d = 70-90 nm, -SO<sub>3</sub>H content = 0.47 mmol/g, -NH<sub>2</sub> content = 0.52 mmol/g)**

First, 3.0 mL of TEOS and 210 μL of MPTMS was added sequentially into the homogeneous solution composed of H<sub>2</sub>O (40 mL), ethanol (8 mL), CTAB (1.5 g) and 25 wt% NH<sub>3</sub>·H<sub>2</sub>O (160 μL) under vigorous stirring at room temperature. After continually stirring for 1 h, TEOS (200 μL) was added to create an intermediate shell in order to isolate the inner core shell from the outer shell. The resulting suspension was stirred for an additional 1 h. Then a mixture of TEOS (260 μL) and APTMS (240 μL) was added. The following steps, that is, template removal, amino group protection/deprotection and thiol group oxidation were conducted via the same synthesis route of MS-SO<sub>3</sub>H@MS@MS-NH<sub>2</sub> in Experimental section 2.2.

The TEM image of the sample was shown in Figure S2b.

**(c) MS-SO<sub>3</sub>H@MS@MS-NH<sub>2</sub> (d = 80-100 nm, -SO<sub>3</sub>H content = 0.28 mmol/g, -NH<sub>2</sub> content = 0.53 mmol/g)**

First, 3.0 mL of TEOS and 100 μL of MPTMS was added sequentially into the homogeneous solution composed of H<sub>2</sub>O (38 mL), ethanol (10 mL), CTAB (1.5 g) and 25 wt% NH<sub>3</sub>·H<sub>2</sub>O (160 μL) under vigorous stirring at room temperature. After continually stirring for 1 h, TEOS (200 μL) was added to create an intermediate shell in order to isolate the inner core shell from the outer shell. The resulting suspension was stirred for an additional 1 h. Then a mixture of TEOS (250 μL) and APTMS (250 μL) was added. The following steps, that is, template removal, amino group protection/deprotection and thiol group oxidation were conducted via the same synthesis route of MS-SO<sub>3</sub>H@MS@MS-NH<sub>2</sub> in Experimental section 2.2.

The TEM image of the sample was shown in Figure S2c.

**(d) MS-SO<sub>3</sub>H@MS@MS-NH<sub>2</sub> (d = 250-300 nm, -SO<sub>3</sub>H content = 0.60 mmol/g, -NH<sub>2</sub> content = 0.93 mmol/g)**

First, 2.2 mL of TEOS and 220 μL of MPTMS was added sequentially into the homogeneous solution composed of H<sub>2</sub>O (36 mL), ethanol (12 mL), CTAB (1.5 g) and 25 wt% NH<sub>3</sub>·H<sub>2</sub>O (160 μL) under vigorous stirring at 60 °C. After continually stirring for 1 h, TEOS (100 μL) was added to create an intermediate shell in order to isolate the inner core shell from the outer shell. The resulting suspension was stirred for an additional 1 h. Then a mixture of TEOS (500 μL) and APTMS (400 μL) was added. The following steps, that is, template removal, amino group protection/deprotection and thiol group oxidation were conducted via the same synthesis route of

MS-SO<sub>3</sub>H@MS@MS-NH<sub>2</sub> in Experimental section 2.2.  
The TEM image of the sample was shown in Figure S2d.

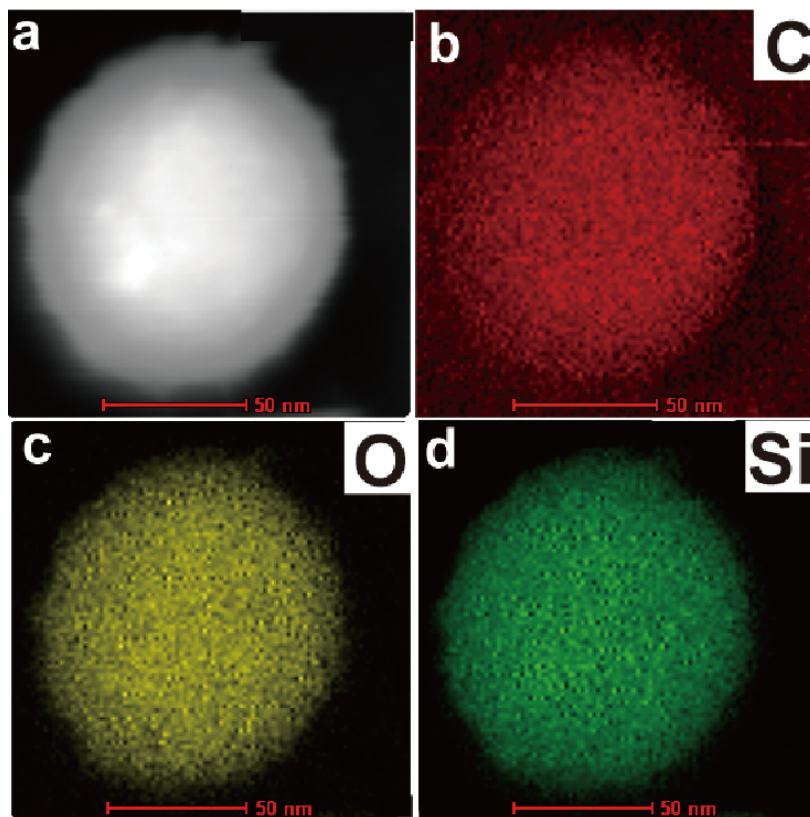

**Figure S1.** (a) STEM image and (b) carbon, (c) oxygen, (d) silicon EDX elemental mappings of core-shell-shell structured MS-SO<sub>3</sub>H@MS@MS-NH<sub>2</sub>.



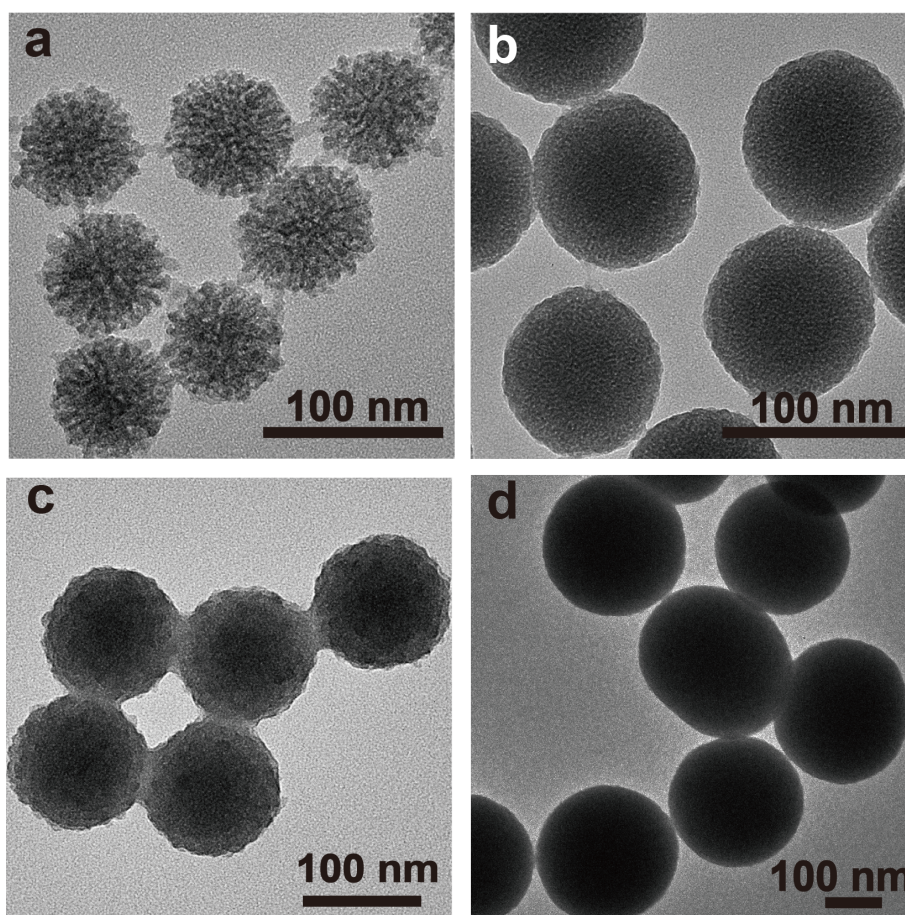

**Figure S2.** TEM images of MS-SO<sub>3</sub>H@MS@MS-NH<sub>2</sub> with different particle sizes and different densities of acid/basic reactive sites via adjusting the ratios of different precursors, the solvent ratio and temperature during the synthesis.

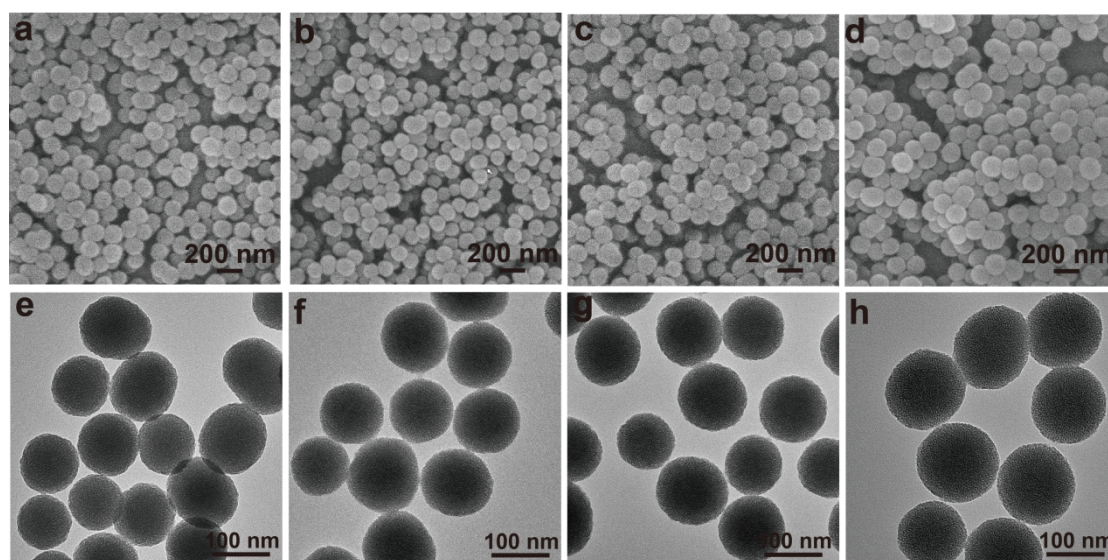

**Figure S3.** SEM images of (a) MS-SO<sub>3</sub>H@MS, (b) MS@MS-NH<sub>2</sub>, (c) MS-SO<sub>3</sub>H@MS-NH<sub>2</sub> and (d) MS-SO<sub>3</sub>H-NH<sub>2</sub>. TEM images of (e) MS-SO<sub>3</sub>H@MS, (f) MS@MS-NH<sub>2</sub>, (g) MS-SO<sub>3</sub>H@MS-NH<sub>2</sub> and (h) MS-SO<sub>3</sub>H-NH<sub>2</sub>.



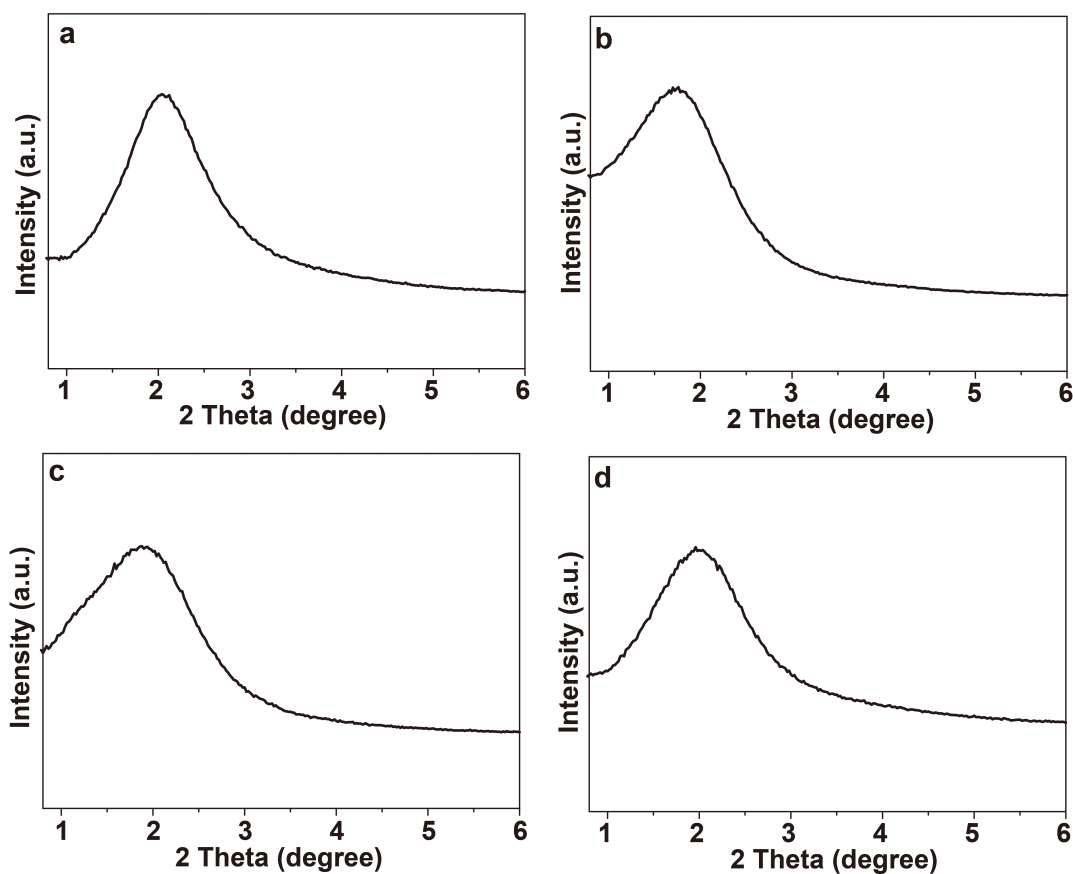

**Figure S4.** Small-angle XRD patterns of (a) MS-SO<sub>3</sub>H@MS, (b) MS@MS-NH<sub>2</sub>, (c) MS-SO<sub>3</sub>H@MS-NH<sub>2</sub> and (d) MS-SO<sub>3</sub>H-NH<sub>2</sub>.

**Table S1.** Physicochemical parameters of the control samples from N<sub>2</sub> adsorption-desorption measurement and elemental analysis.

| Sample                                  | BET surface area (m <sup>2</sup> /g) | Pore volume (cm <sup>3</sup> /g) | NLDFT pore size (nm) | -SO <sub>3</sub> H content (mmol/g) | -NH <sub>2</sub> content (mmol/g) |
|-----------------------------------------|--------------------------------------|----------------------------------|----------------------|-------------------------------------|-----------------------------------|
| MS-SO <sub>3</sub> H@MS                 | 1088                                 | 0.92                             | 3.54                 | 0.50                                | -                                 |
| MS@MS-NH <sub>2</sub>                   | 886                                  | 0.60                             | 3.18                 | -                                   | 0.81                              |
| MS-SO <sub>3</sub> H@MS-NH <sub>2</sub> | 946                                  | 0.61                             | 3.18                 | 0.52                                | 0.79                              |
| MS-SO <sub>3</sub> H-NH <sub>2</sub>    | 931                                  | 0.63                             | 3.18                 | 0.50                                | 0.79                              |

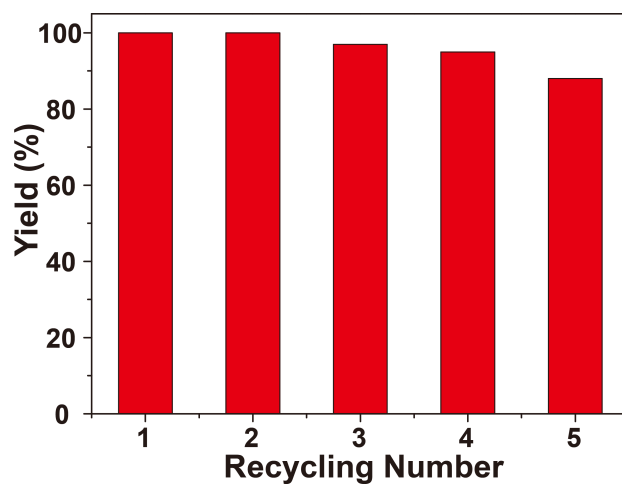

**Figure S5.** Recycling test of MS-SO<sub>3</sub>H@MS@MS-NH<sub>2</sub> in the reaction between benzaldehyde dimethyl acetal and ethyl cyanoacetate.

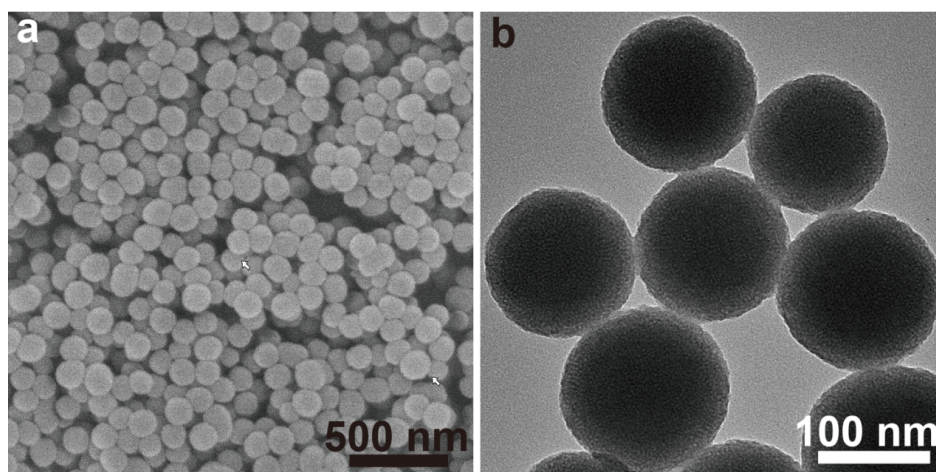

**Figure S6.** TEM image of MS-SO<sub>3</sub>H@MS@MS-NH<sub>2</sub> as bifunctional catalyst after being used repetitively for 5 times.

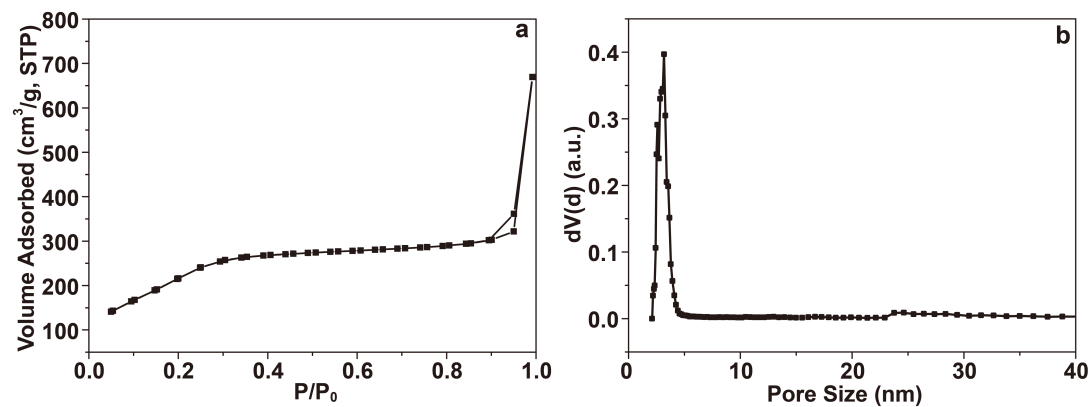

**Figure S7.** (a) N<sub>2</sub> adsorption-desorption isotherm and (b) NLDFT pore size distribution of MS-SO<sub>3</sub>H@MS@MS-NH<sub>2</sub> after being used repetitively for 5 times. (BET surface area: 833.5 m<sup>2</sup>/g; Pore volume: 0.52 cm<sup>3</sup>/g; NLDFT pore size: 3.18 nm).
